# Supplementary material for: Development of a Green Methodology for Simultaneous Extraction of Polyphenols and Pigments from Red Winemaking Solid Wastes (Pomace) Using a Novel Glycerol-Sodium Benzoate Deep Eutectic Solvent and Ultrasonication Pretreatment
Source: MDPI journal article supplement (doi:10.3390/environments8090090), 2021-09-03
Supplement: s1 [file s1]

Archive with 1 entries (1 files):
- environments-1302291-SI.pdf
